# Supplementary material for: Spadin Modulates Astrocytic Passive Conductance via Inhibition of TWIK-1/TREK-1 Heterodimeric Channels
Source: MDPI journal article supplement (doi:10.3390/ijms21249639), 2020-12-17
Supplement: s1 [file s1]

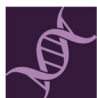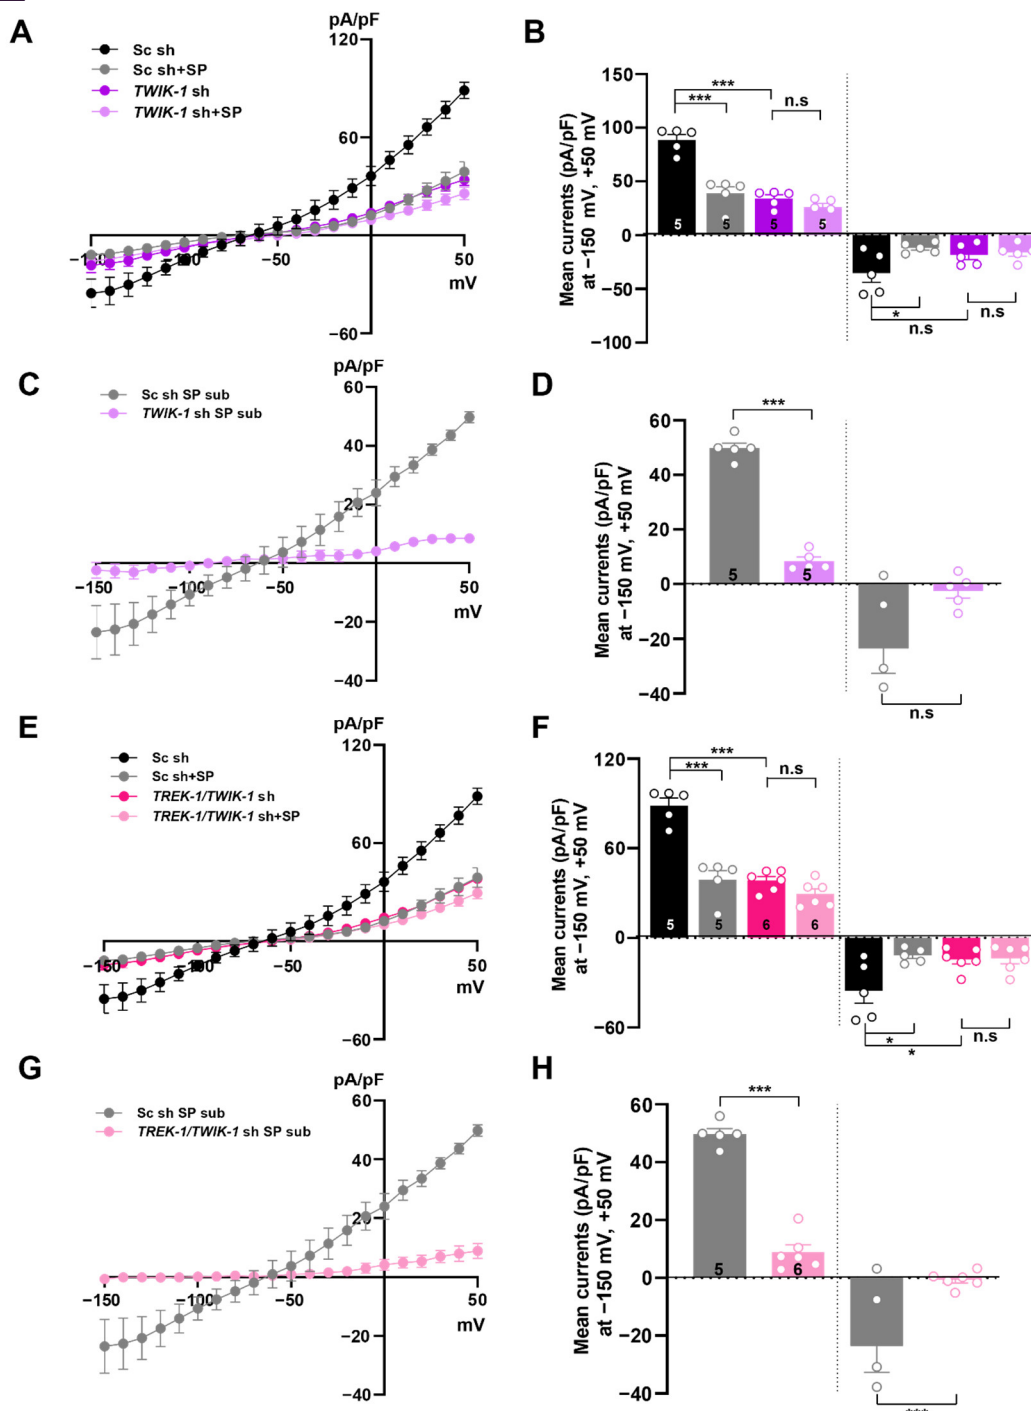

**Figure S1.** Spadin does not alter K<sup>+</sup> conductance in *TWIK-1* or both *TREK-1* and *TWIK-1* knock-down astrocytes. (A) K<sup>+</sup> current densities were recorded in primary astrocytes transfected with scrambled shRNA (sc sh) or *TWIK-1* shRNA before and after 10  $\mu$ M spadin (SP) treatment. (B) Summary histogram showing averaged current densities in each group in (A) at -150 mV and +50 mV. Number on each bar indicates *n* for each condition. All values are mean  $\pm$  s.e.m. *P*-values were obtained with one-way ANOVA followed by Turkey's post hoc test. n.s.: not significant, \**P* < 0.05 and \*\*\**P* < 0.01. (C) Spadin-sensitive currents were calculated by differences between currents before and after spadin treatment in (A). (D) Summary histogram indicating averaged spadin-sensitive currents from the plot in (C) at +50 mV and -150 mV. All values are mean  $\pm$  s.e.m. *P*-values were obtained with Student's *t*-test. n.s.: not significant, \*\*\**P* < 0.001. (E) Current densities were measured in astrocytes transfected with scrambled control shRNA (Sc shRNA) or *TREK-1* shRNA/*TWIK-1* shRNA before and after

spadin administration. (F ~ H) Summary plot and bar graphs showing the same parameters as in (B ~ D), respectively. Number on each bar indicates *n* for each condition. All values are mean  $\pm$  s.e.m. *P*-values were obtained with one-way ANOVA followed by Turkey's post hoc test or Student's *t*-test. n.s: not significant, \**P* < 0.05 and \*\*\**P* < 0.001.

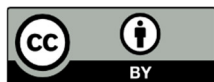

© 2020 by the author. Licensee MDPI, Basel, Switzerland. This article is an open access article distributed under the terms and conditions of the Creative Commons Attribution (CC BY) license (<http://creativecommons.org/licenses/by/4.0/>).
